# Supplementary material for: Long non-coding RNA HOXA11-AS accelerates cell proliferation and epithelial-mesenchymal transition in hepatocellular carcinoma by modulating the miR-506-3p/Slug axis
Source: PubMed Central journal article supplement — Int J Mol Med. 2020 Aug 28;46(5):1805–15. doi: 10.3892/ijmm.2020.4715 (PMC7521580; doi:10.3892/ijmm.2020.4715), 2020-08-28

Figure S1. Transfection efficiency of anti-miR-506-3p, HOXA11-AS and Slug in HCC cells. (A) Expression of miR-506-3p was detected by RT-qPCR. (B) Expression of HOXA11-AS was measured by RT-qPCR. (C and D) Protein expression of Slug in HCC cells was measured by western blot analysis. \*P<0.05 vs. respective control. HCC, hepatocellular carcinoma.

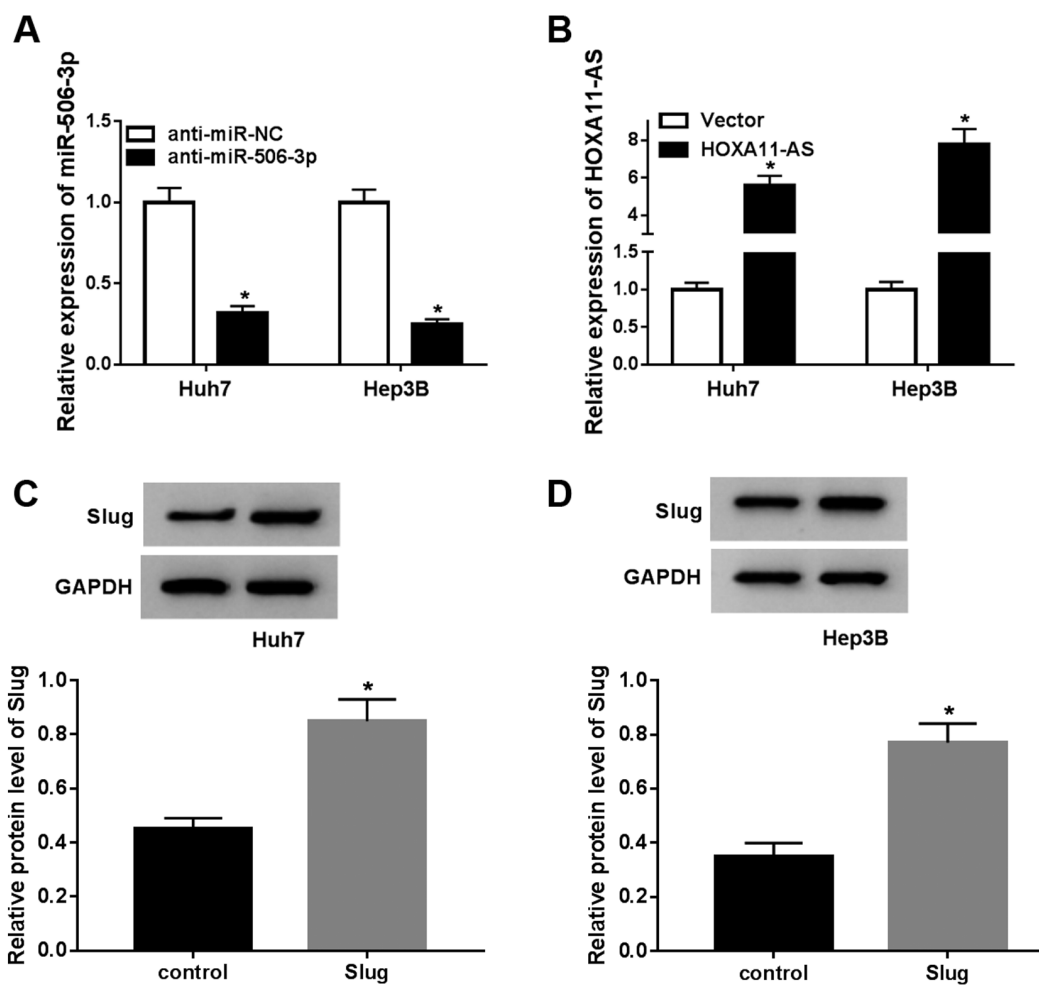

Supplement: Supplementary_Data.pdf [file Supplementary_Data.pdf]
